# Supplementary material
Source: MDPI journal article supplement (https://www.mdpi.com/2311-5637/9/6/533)
Supplement: s1 [file s1]

Supplementary Material

# **Fermentation of cocoa pulp (*Theobroma cacao* L.) by *Laetiporus persicinus* yields novel beverages with tropical aroma**

Victoria Klis <sup>1,2</sup>, Eva Pühn <sup>2</sup>, Jeanny Jaline Jerschow <sup>1,2</sup>, Marco Alexander Fraatz <sup>2</sup> and Holger Zorn <sup>1,2,\*</sup>

<sup>1</sup> Fraunhofer Institute for Molecular Biology and Applied Ecology, Ohlebergsweg 12, 35392 Giessen, Germany; victoria.klis@ime.fraunhofer.de (V.K.); jeanny.jerschow@ime.fraunhofer.de (J.J.J.);

<sup>2</sup> Institute of Food Chemistry and Food Biotechnology, Justus Liebig University Giessen, Heinrich-Buff-Ring 17, 35392 Giessen, Germany; eva.puehn@lc.chemie.uni-giessen.de (E.P.); marco.fraatz@lcb.chemie.uni-giessen.de (M.A.F.)

\* Correspondence: holger.zorn@ime.fraunhofer.de; Tel.: +49-641-972-19130

**Table S1.** Concentrations, stock solution and dilution levels of standard addition.

| compound               | stock [ $\mu\text{g/L}$ ] | concentration [ $\mu\text{g/L}$ ] |        |        |        |        |
|------------------------|---------------------------|-----------------------------------|--------|--------|--------|--------|
|                        |                           | S0                                | S1     | S2     | S3     | S4     |
| 2-nonanone             | 257.4                     | 0                                 | 0.31   | 0.67   | 1.29   | 1.96   |
| (R)-linalool           | 21,850.0                  | 0                                 | 48.07  | 96.14  | 144.21 | 192.28 |
| (E)-nerolidol          | 1000.0                    | 0                                 | 5.00   | 10.00  | 20.00  | 30.00  |
| methyl benzoate        | 66.0                      | 0                                 | 0.13   | 0.26   | 0.39   | 0.52   |
| 1-phenylethyl acetate  | 98.0                      | 0                                 | 0.19   | 0.39   | 0.58   | 0.77   |
| 2-phenylethanol        | 7380.0                    | 0                                 | 14.47  | 28.94  | 43.41  | 57.88  |
| 5-butyl-2(5H)-furanone | 100,800.0                 | 0                                 | 197.65 | 395.29 | 592.94 | 790.59 |

**Table S2.** Odor impressions in the plate screening for cocoa pulp agar (CPA) and malt extract agar (MEA) on the most responsive day, as well as the overall rating R and the intensity of the odor I (-- very weak/ very bad; - weak/ bad; 0 medium/ neutral; + intensive/ good; ++ very intensive/ very good)

| fungus species                      | day | odor impression CP agar plate                           | R  | I  | odor impression ME agar plate               | R  | I  |
|-------------------------------------|-----|---------------------------------------------------------|----|----|---------------------------------------------|----|----|
| <i>Pleurotus sapidus</i>            | 8   | bitter almond, sweetish, mushroom                       | ++ | 0  | bitter almond, mushroom                     | 0  | 0  |
| <i>Wolfiporia cocos</i>             | 2   | fruity, flowery, wild strawberry, berry                 | ++ | ++ | malt extract / reference                    | 0  | 0  |
| <i>Lentinula edodes</i>             | 10  | sweetish, flowery                                       | +  | 0  | mushroom, spicy                             | 0  | -- |
| <i>Laetiporus sulfureus</i>         | 4   | tropical-fruity, sweetish, acidic                       | ++ | +  | spicy, malty                                | 0  | 0  |
| <i>Pleurotus eryngii</i>            | 16  | sweetish, fruity, fresh                                 | +  | +  | neutral                                     | 0  | -- |
| <i>Irpex consors</i>                | 6   | mushroom, sweet                                         | 0  | 0  | mushroom, woody, earthy                     | -- | 0  |
| <i>Pholiota nameko</i>              | 8   | fresh, fruity                                           | 0  | 0  | mouldy, sweet                               | -- | 0  |
| <i>Pleurotus citrinopileatus</i>    | 18  | sweetish, fruity, fresh                                 | +  | 0  | humid, mouldy, pungent                      | -- | ++ |
| <i>Fomitopsis pinicola</i>          | 4   | fruity, mushroom                                        | +  | 0  | earthy, mushroom                            | 0  | 0  |
| <i>Flammulina velutipes</i>         | 18  | flowery, sweetish, ethereal, herbaceous                 | +  | 0  | pungent, herbaceous, earthy, mouldy         | -- | ++ |
| <i>Pleurotus salmoneostramineus</i> | 8   | fresh, sweetish                                         | +  | -  | bitter almond                               | ++ | -- |
| <i>Antrodia xantha</i>              | 4   | fruity, acidic, sweetish                                | ++ | ++ | malt extract / reference                    | 0  | 0  |
| <i>Piptoporus betulinus</i>         | 4   | fruity, fresh, sweetish                                 | ++ | ++ | malt extract / reference                    | 0  | 0  |
| <i>Psathyrella piluliformis</i>     | 12  | apple, sweetish, acidic, fruity                         | ++ | +  | sweetish, acidic, alcoholic                 | ++ | ++ |
| <i>Psathyrella candolleana</i>      | 18  | sweetish, fruity                                        | ++ | ++ | stable, nauseous                            | -- | ++ |
| <i>Pleurotus ostreatus</i>          | 4   | sweetish, fruity, flowery                               | ++ | ++ | malt extract / reference                    | 0  | 0  |
| <i>Stropharia rugosoannulata</i>    | 14  | sweetish, fruity, synthetic                             | ++ | ++ | sweetish, synthetic, apple, acidic, pungent | ++ | ++ |
| <i>Laetiporus portentosus</i>       | 16  | tropical-fruity, coconut, sweetish, peach               | ++ | ++ | spicy, meaty                                | 0  | ++ |
| <i>Laetiporus persicinus</i>        | 4   | tropical-fruity, peach, sweetish, passionfruit, coconut | ++ | ++ | malt extract / reference                    | 0  | 0  |
| <i>Laetiporus montanus</i>          | 4   | tropical-fruity, peach, sweetish, passionfruit          | ++ | ++ | malt extract / reference                    | 0  | 0  |

**Table S3.** Regression curves and regression coefficient  $R^2$  of standard additions ( $n=2$ ).

| compound                             | regression curve                | $R^2$  |
|--------------------------------------|---------------------------------|--------|
| 2-nonanone ( <b>8</b> )              | $y_a = 2,175,936x + 3,372,866$  | 0.9760 |
|                                      | $y_b = 2,096,828x + 3,122,653$  | 0.9735 |
| (R)-linalool ( <b>13</b> )           | $y_a = 465,456x + 77,391,310$   | 0.9049 |
|                                      | $y_b = 430,021x + 70,375,071$   | 0.9299 |
| methyl benzoate ( <b>14</b> )        | $y_a = 8,880,587x + 3,192,385$  | 0.9367 |
|                                      | $y_b = 7,991,627x + 3,744,818$  | 0.9779 |
| 1-phenylethyl acetate ( <b>15</b> )  | $y_a = 3,703,927x + 2,839,751$  | 0.9700 |
|                                      | $y_b = 4,329,011x + 2,521,606$  | 0.9505 |
| 2-phenylethanol ( <b>22</b> )        | $y_a = 161,268x + 30,968,045$   | 0.9583 |
|                                      | $y_b = 148,911x + 28,838,160$   | 0.9414 |
| 5-butyl-2(5H)-furanone ( <b>24</b> ) | $y_a = 1,906x + 618,208$        | 0.9827 |
|                                      | $y_b = 1,718x + 637,004$        | 0.9739 |
| (E)-nerolidol ( <b>27</b> )          | $y_a = 1,166,129x + 43,599,755$ | 0.9757 |
|                                      | $y_b = 862,180x + 40,851,867$   | 0.9419 |

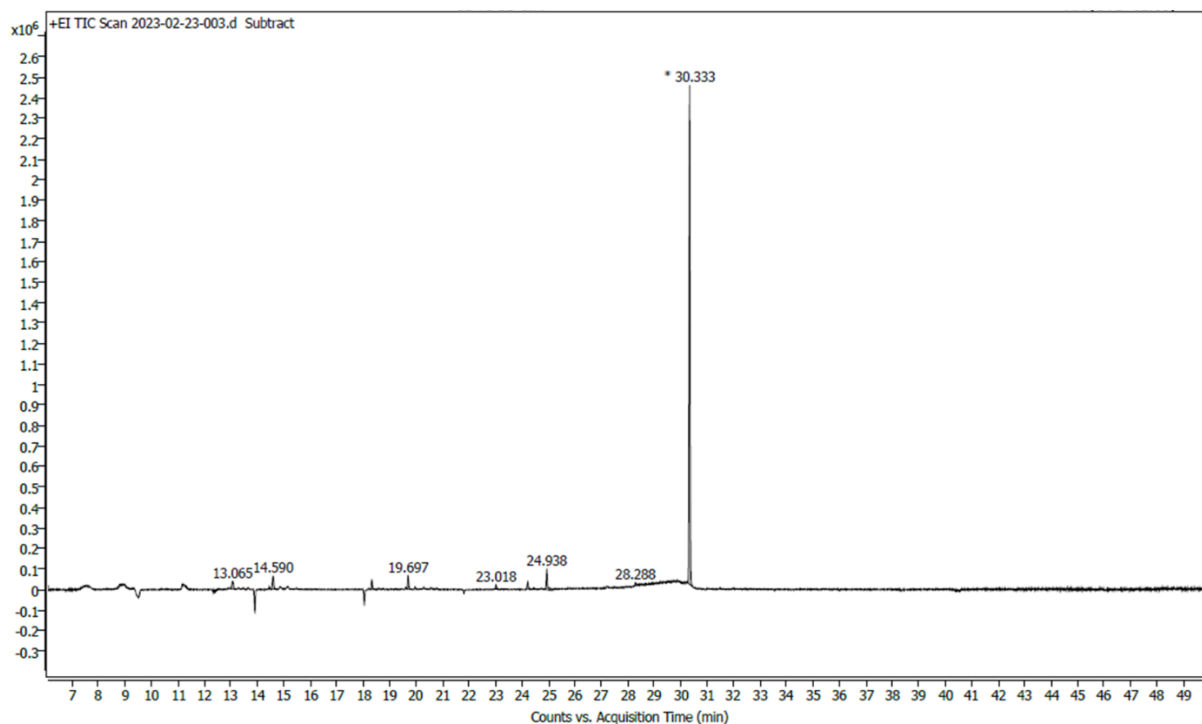

**Figure S1.** Chromatogram for determination of the chromatographic purity of 5-butyl-2(5H)-furanone (30.333 min), minus blank measurement of the solvent. Purity = 76%.

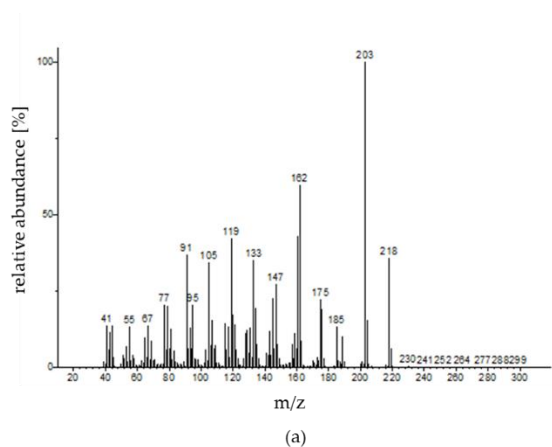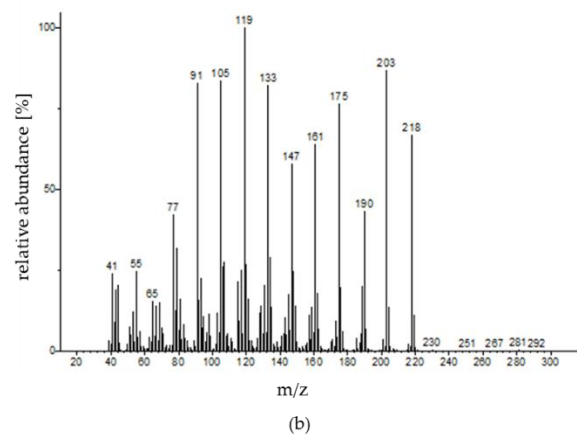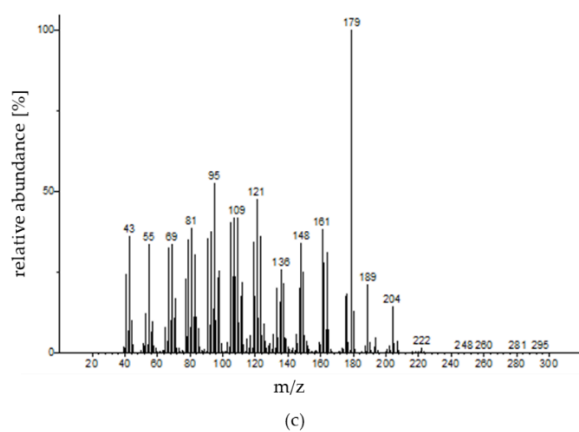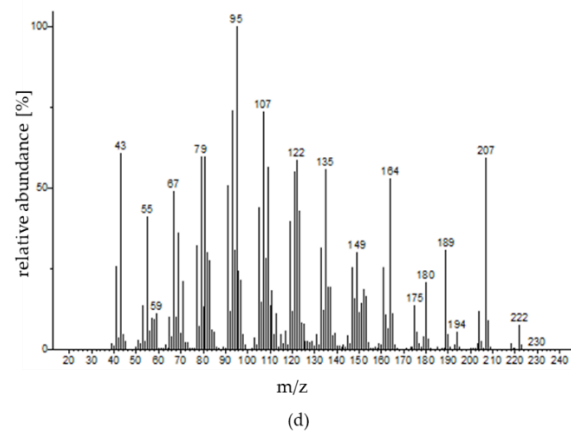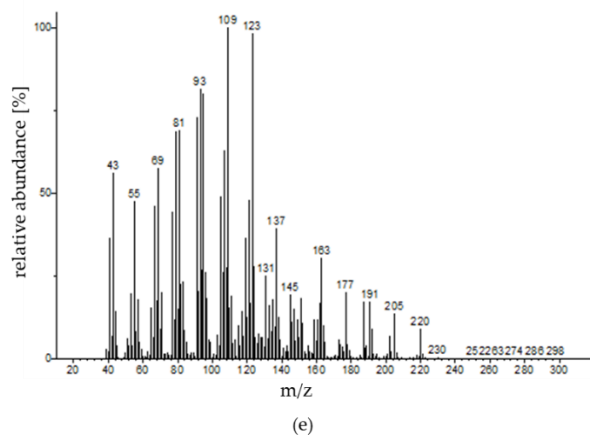

**Figure S2.** Mass spectra of **18** (a), **21** (b), **23** (c), **25** (d) and **26** (e).
